# Supplementary material for: Urine Drug Screening in a Telehealth Setting for the Treatment of Opioid Use Disorder
Source: PubMed Central journal article supplement — JAMA Health Forum. 2023 Jul 28;4(7):e232247. doi: 10.1001/jamahealthforum.2023.2247 (PMC10383010; doi:10.1001/jamahealthforum.2023.2247), 2023-07-28
Supplement: jamahealthforum-e232247-s001.pdf [file jamahealthforum-e232247-s001.pdf]

## Supplemental Online Content

Williams AR, Rowe C, Gallagher R, Aronowitz SV, Diamond-Reivich J, Bisaga A. Urine drug screening in a telehealth setting for the treatment of opioid use disorder. *JAMA Health Forum*. 2023;4(7):e232247. doi:10.1001/jamahealthforum.2023.2247

### eMethods

**eTable 1:** U.S. state of all patients (n=3,395)

**eTable 2:** Clinician rates of completed UDS per patient year, by month in care

**eTable 3:** Urine drug screen results during baseline (first urine drug screen within 30 days of initiating treatment) and follow-up (closest urine drug screen to 180 days after initiating treatment, between 150 and 210 days after initiating treatment) (n=1,178)

**eTable 4:** Urine drug screen results during baseline (first urine drug screen within 30 days of initiating treatment) and follow-up (closest urine drug screen to 180 days after initiating treatment, between 90 and 270 days after initiating treatment) (n=1,904)

**eTable 5:** Urine drug screen results during baseline (within 30 days of initiating treatment) by whether or not patient has a urine drug screen during follow-up (between 120 and 240 days after initiating treatment) (n=2,782)

This supplemental material has been provided by the authors to give readers additional information about their work.

## **eMethods**

### **Clinician Variation in UDS Completion**

We calculated rates of UDS completion for each clinician and month in care, for months one through six, as follows. For each clinician, we calculated the total amount of patient time associated with each month in care (defined using 30-day intervals from the start of treatment). For example, if a clinician had a panel of only two patients, one who was retained for 90 days and another who was retained for 180 days, they would have 60 days of patient-time for months 1-3 and 30 days of patient-time for months 4-6. We then calculated the total number of UDS completed among a clinician's patients for each month in care. The rate of UDS completion for each clinician and month in care was then calculated as the total number of UDS completed per one year of patient time for a given clinician and month in care. Clinician months in care were excluded if they had less than 180 days of patient-time.

We then summarized the clinician rates of UDS completion for each month in care

We observed variation in rates of UDS completion across clinicians and months in care, which is presented in eTable 2 (and Figure 1).

**eTable 1: U.S. state of all patients (n=3,395)**

| U.S. state   | N (%)         |
|--------------|---------------|
| Pennsylvania | 1,476 (43.5%) |
| New York     | 1,033 (30.4%) |
| Florida      | 287 (8.5%)    |
| Maryland     | 98 (2.9%)     |
| Texas        | 87 (2.6%)     |
| California   | 79 (2.3%)     |
| Connecticut  | 74 (2.2%)     |
| New Jersey   | 67 (2.0%)     |
| Arizona      | 60 (1.8%)     |
| Virginia     | 58 (1.7%)     |
| Maine        | 32 (0.9%)     |
| Vermont      | 25 (0.7%)     |
| Washington   | 14 (0.4%)     |
| Montana      | <10           |

**eTable 2: Clinician rates of completed UDS per patient year, by month in care**

|               |                      | Completed UDS per patient-month |                  |
|---------------|----------------------|---------------------------------|------------------|
| Month in care | Number of clinicians | Mean (SD)                       | Median (IQR)     |
| One           | 44                   | 1.18 (0.43)                     | 1.13 (0.86-1.32) |
| Two           | 43                   | 0.61 (0.28)                     | 0.6 (0.41-0.81)  |
| Three         | 41                   | 0.44 (0.23)                     | 0.45 (0.31-0.53) |
| Four          | 40                   | 0.34 (0.2)                      | 0.36 (0.24-0.43) |
| Five          | 40                   | 0.36 (0.17)                     | 0.35 (0.27-0.48) |
| Six           | 39                   | 0.33 (0.14)                     | 0.32 (0.27-0.41) |

**eTable 3: Urine drug screen results during baseline (first urine drug screen within 30 days of initiating treatment) and follow-up (closest urine drug screen to 180 days after initiating treatment, between 150 and 210 days after initiating treatment) (n=1,178)**

| <b>Drug</b>     | <b>Baseline<br/>N (%)</b> | <b>Follow-up<br/>N (%)</b> | <b>p-value*</b> |
|-----------------|---------------------------|----------------------------|-----------------|
| Buprenorphine   | 1,140 (96.8%)             | 1,160 (98.5%)              | 0.01            |
| Opioids         | 90 (7.6%)                 | 42 (3.6%)                  | <0.001          |
| Fentanyl        | 46 (3.9%)                 | 19 (1.6%)                  | 0.001           |
| Methadone       | 9 (0.8%)                  | 3 (0.3%)                   | 0.15            |
| Oxycodone       | 27 (2.3%)                 | 16 (1.4%)                  | 0.08            |
| Tramadol        | 7 (0.6%)                  | 5 (0.4%)                   | 0.75            |
| Other opioids   | 23 (2.0%)                 | 6 (0.5%)                   | 0.001           |
| Methamphetamine | 52 (4.4%)                 | 43 (3.7%)                  | 0.22            |
| Cocaine         | 44 (3.7%)                 | 32 (2.7%)                  | 0.11            |
| Benzodiazepines | 105 (8.9%)                | 82 (7.0%)                  | 0.030           |
| Amphetamines    | 115 (9.8%)                | 123 (10.4%)                | 0.51            |
| Alcohol         | 148 (12.6%)               | 141 (12.0%)                | 0.69            |
| Cannabis        | 440 (37.4%)               | 441 (37.4%)                | 1.00            |

\*p-values calculated using McNemar's tests.

**eTable 4: Urine drug screen results during baseline (first urine drug screen within 30 days of initiating treatment) and follow-up (closest urine drug screen to 180 days after initiating treatment, between 90 and 270 days after initiating treatment) (n=1,904)**

| <b>Drug</b>     | <b>Baseline<br/>N (%)</b> | <b>Follow-up<br/>N (%)</b> | <b>p-value*</b> |
|-----------------|---------------------------|----------------------------|-----------------|
| Buprenorphine   | 1,845 (96.9%)             | 1,876 (98.5%)              | 0.001           |
| Opioids         | 150 (7.9%)                | 63 (3.3%)                  | <0.001          |
| Fentanyl        | 82 (4.3%)                 | 31 (1.6%)                  | <0.001          |
| Methadone       | 15 (0.8%)                 | 4 (0.2%)                   | 0.02            |
| Oxycodone       | 41 (2.2%)                 | 22 (1.2%)                  | 0.009           |
| Tramadol        | 9 (0.5%)                  | 6 (0.3%)                   | 0.58            |
| Other opioids   | 34 (1.8%)                 | 11 (0.6%)                  | <0.001          |
| Methamphetamine | 75 (3.9%)                 | 58 (3.0%)                  | 0.04            |
| Cocaine         | 67 (3.5%)                 | 40 (2.1%)                  | 0.002           |
| Benzodiazepines | 169 (8.9%)                | 125 (6.6%)                 | 0.001           |
| Amphetamines    | 175 (9.2%)                | 198 (10.4%)                | 0.091           |
| Alcohol         | 241 (12.7%)               | 230 (12.1%)                | 0.55            |
| Cannabis        | 733 (38.5%)               | 714 (37.5%)                | 0.34            |

\*p-values calculated using McNemar's tests.

**eTable 5: Urine drug screen results during baseline (within 30 days of initiating treatment) by whether or not patient has a urine drug screen during follow-up (between 120 and 240 days after initiating treatment) (n=2,782)**

| <b>Drug</b>     | <b>Has baseline and follow-up urine drug screen (n=1,754)<br/>N (%)</b> | <b>Does not have baseline and follow-up urine drug screen (n=1,028)<br/>N (%)</b> | <b>p-value*</b> |
|-----------------|-------------------------------------------------------------------------|-----------------------------------------------------------------------------------|-----------------|
| Buprenorphine   | 1,699 (96.9%)                                                           | 974 (94.7%)                                                                       | 0.005           |
| Opioids         | 138 (7.9%)                                                              | 126 (12.3%)                                                                       | <0.001          |
| Fentanyl        | 76 (4.3%)                                                               | 86 (8.4%)                                                                         | <0.001          |
| Methadone       | 15 (0.9%)                                                               | 7 (0.7%)                                                                          | 0.6             |
| Oxycodone       | 36 (2.1%)                                                               | 27 (2.6%)                                                                         | 0.3             |
| Tramadol        | 8 (0.5%)                                                                | 8 (0.8%)                                                                          | 0.3             |
| Other opioids   | 33 (1.9%)                                                               | 29 (2.8%)                                                                         | 0.11            |
| Methamphetamine | 66 (3.8%)                                                               | 71 (6.9%)                                                                         | <0.001          |
| Cocaine         | 60 (3.4%)                                                               | 59 (5.7%)                                                                         | 0.004           |
| Benzodiazepines | 155 (8.8%)                                                              | 100 (9.7%)                                                                        | 0.4             |
| Amphetamines    | 164 (9.4%)                                                              | 117 (11.4%)                                                                       | 0.086           |
| Alcohol         | 214 (12.2%)                                                             | 142 (13.8%)                                                                       | 0.2             |
| Cannabis        | 680 (38.8%)                                                             | 412 (40.1%)                                                                       | 0.5             |

\*p-values calculated using chi-squared tests.
