# Supplementary material for: Urine Drug Screening in a Telehealth Setting for the Treatment of Opioid Use Disorder
Source: PubMed Central journal article supplement — JAMA Health Forum. 2023 Jul 28;4(7):e232247. doi: 10.1001/jamahealthforum.2023.2247 (PMC10383010; doi:10.1001/jamahealthforum.2023.2247), 2023-07-28
Supplement: jamahealthforum-e232247-s002.pdf [file jamahealthforum-e232247-s002.pdf]

## Data Sharing Statement

Williams. Urine Drug Screening in a Telehealth Setting for the Treatment of Opioid Use Disorder. *JAMA Health Forum*. Published July 28, 2023.  
doi:10.1001/jamahealthforum.2023.2247

### Data

**Data available:** No
